# Supplementary material for: Genomic Analysis of Sindbis Virus Reveals Uncharacterized Diversity within the Australasian Region, and Support for Revised SINV Taxonomy
Source: MDPI journal article supplement (doi:10.3390/v16010007), 2023-12-20
Supplement: s1 [file s1]

|    | G1            | G2            | G3            | G4            | G5            | G6            |
|----|---------------|---------------|---------------|---------------|---------------|---------------|
| G1 |               | 24.50– 26.84  | 24.52 – 26.24 | 17.82 – 19.91 | 28.37 – 29.39 | 22.50 – 24.25 |
| G2 | 13.67 – 16.60 |               | 8.55 – 9.70   | 26.93 – 27.95 | 30.20 – 31.26 | 25.90 – 27.52 |
| G3 | 14.18 – 16.09 | 1.53 – 3.95   |               | 26.58 – 27.52 | 30.20 – 30.31 | 26.24 – 27.39 |
| G4 | 9.45 – 11.49  | 16.22 – 18.14 | 16.47 – 17.11 |               | 30.54 – 30.63 | 26.54 – 26.93 |
| G5 | 21.07 – 21.97 | 22.61 – 23.63 | 23.12 – 23.24 | 22.35 – 22.73 |               | 29.09 – 29.48 |
| G6 | 12.01 – 14.05 | 15.33 – 17.63 | 16.22 – 17.62 | 15.07 – 16.60 | 21.84 – 22.73 |               |
