# Supplementary figures and images for: Genomic Analysis of Sindbis Virus Reveals Uncharacterized Diversity within the Australasian Region, and Support for Revised SINV Taxonomy
Source: MDPI journal article supplement (doi:10.3390/v16010007), 2023-12-20

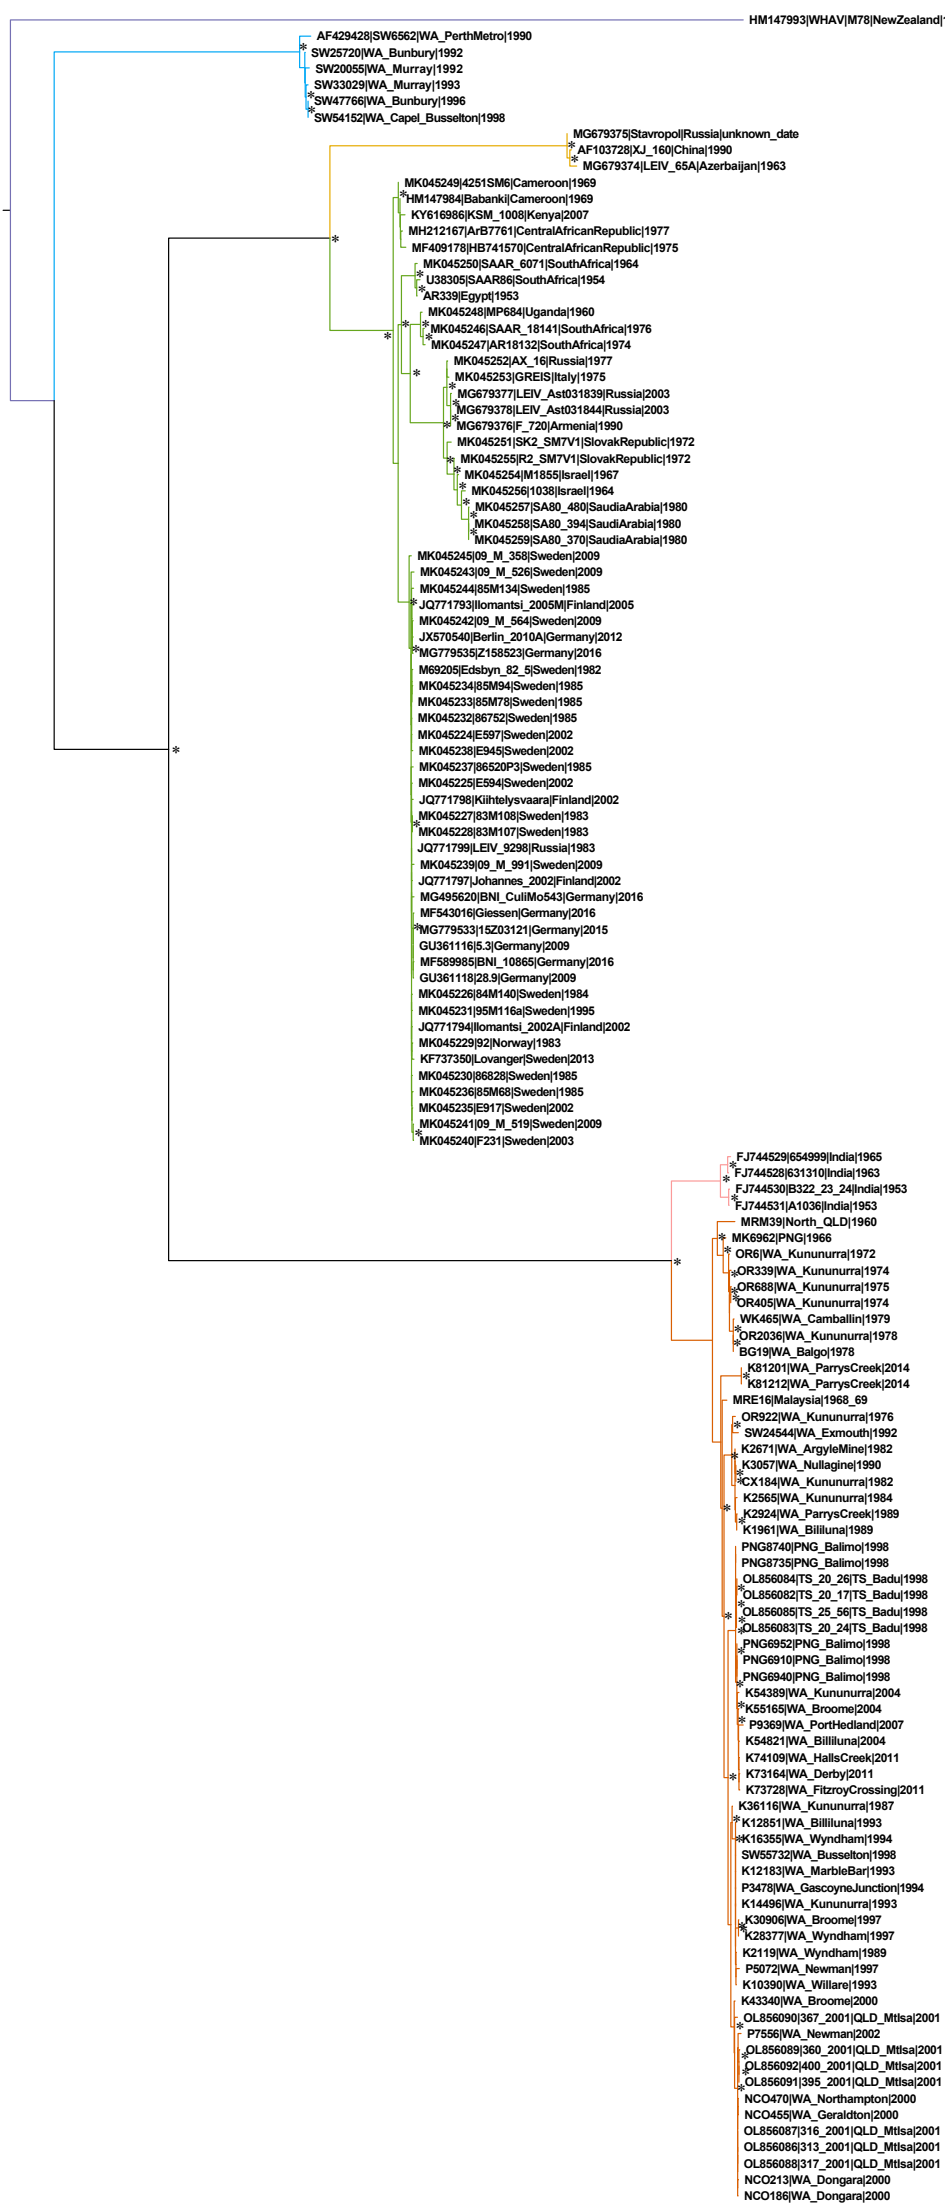

Supplement: s1 [file s1]
